# Supplementary material for: Feeding the machine: Challenges to reproducible predictive modeling in resting-state connectomics
Source: PubMed Central journal article supplement (PMC8942606; doi:10.1162/netn_a_00212), 2022-02-01
Supplement: netn-06-29-s001.pdf [file netn-06-29-s001.pdf]

Cwiek, A., Rajtmajer, S. M., Wyble, B., Honavar, V., Grossner, E. & Hillary, F. G. (2022). Supporting information for “Feeding the machine: Challenges to reproducible predictive modeling in resting-state connectomics.” *Network Neuroscience*, 6(1), 29–48. [https://doi.org/10.1162/netn\\_a\\_00212](https://doi.org/10.1162/netn_a_00212)

## Supplemental Materials

**Table S1: Frequency of the neurological disorders/syndromes included in this review**

|                                        | Frequency | Percent |
|----------------------------------------|-----------|---------|
| Alzheimer’s disease (MCI, FTD)         | 66        | 26.4%   |
| Mood and psychiatric (depression/ptsd) | 40        | 16.0%   |
| Schizophrenia                          | 34        | 13.6%   |
| Autism spectrum                        | 33        | 13.2%   |
| Brain Injury/stroke                    | 15        | 6.0%    |
| Motor disease (PD, HD)                 | 15        | 6.0%    |
| ADHD                                   | 14        | 5.6%    |
| Epilepsy                               | 13        | 5.2%    |
| Health/Medical                         | 10        | 4.0%    |
| Multiple sclerosis                     | 7         | 2.8%    |
| Substance Abuse                        | 4         | 1.6%    |
| Infants/Children                       | 4         | 1.6%    |
| Other                                  | 9         | 3.6%    |
| Multiple                               | 15        | 6.0%    |

**Table S2: Demographic information collected from the systematic review**

|                               | Percentage of Studies: | Count:    |
|-------------------------------|------------------------|-----------|
| <b>Participants:</b>          | 100%                   | 250       |
| <b>Sex:</b>                   | 86.8%                  | 217       |
| <b>Age:</b>                   | 88.8%                  | 222       |
| <b>Left/Right Handed</b>      | <b>27.2%</b>           | <b>68</b> |
| <b>Education:</b>             | <b>35.6%</b>           | <b>89</b> |
| <b>Times Since Diagnosis:</b> | <b>25.6%</b>           | <b>64</b> |
| <b>Age of Diagnosis:</b>      | <b>10.8%</b>           | <b>27</b> |
| <b>Race / Ethnicity:</b>      | <b>5.6%</b>            | <b>14</b> |
| <b>Socioeconomic Status:</b>  | <b>0.8%</b>            | <b>2</b>  |

**Formula S1: Accuracy derived from sensitivity and specificity scores based upon sample size**

$$Accuracy = \frac{(Sn * CG) + (Sp * HC)}{(CG + HC)}$$

Where *Sn* = sensitivity, *CG* = condition group sample size, *Sp* = Specificity, and *HC* = healthy control sample size.
